# Supplementary material
Source: PubMed Central journal article supplement (PMC3543014)

**Table S1.** Data collection and refinement statistics.

| <b>Data set</b>                          | <b>DPP-IV + Fab</b>  | <b>DPP-IV + Fab + sitagliptin</b> |
|------------------------------------------|----------------------|-----------------------------------|
| <b>Data collection</b>                   |                      |                                   |
| Wavelength (Å)                           | 1.000                | 1.000                             |
| Space group                              | P2 <sub>1</sub>      | P2 <sub>1</sub>                   |
| Unit cell dimensions                     |                      |                                   |
| <i>a, b, c</i> (Å)                       | 97.26, 201.72, 97.28 | 97.77, 200.86, 97.93              |
| $\alpha, \beta, \gamma$ (°)              | 90.00, 93.71, 90.00  | 90.00, 93.64, 90.00               |
| Resolution (Å)                           | 40-2.4 (2.53-2.40)   | 40-2.9 (3.06-2.90)                |
| No. of total reflections                 | 532468 (73584)       | 308152 (45665)                    |
| No. of unique                            | 143426 (20726)       | 82544 (12065)                     |
| Wilson B factor (Å <sup>2</sup> )        | 36.51                | 69.07                             |
| Average Multiplicity                     | 3.7 (3.6)            | 3.7 (3.8)                         |
| Completeness (%)                         | 98.6 (97.8)          | 99.2 (99.2)                       |
| Intensity I/ $\sigma$ I                  | 9.8 (2.2)            | 10.5 (2.7)                        |
| $R_{\text{sym}}^a$                       | 0.101 (0.589)        | 0.080 (0.422)                     |
| <b>Refinement</b>                        |                      |                                   |
| Resolution (Å)                           | 30-2.4 (2.49-2.40)   | 30-2.9 (3.02-2.9)                 |
| $R_{\text{factor}}/ R_{\text{free}}^b$   | 0.270 (0.300)        | 0.275 (0.308)                     |
| No. of Atoms                             |                      |                                   |
| Protein                                  | 18291                | 18371                             |
| Water                                    | 222                  | 42                                |
| Ligand                                   | -                    | 56                                |
| Ramachandran statistics                  |                      |                                   |
| Residues in favored regions              | 93.0%                | 91.0%                             |
| Residues in allowed regions              | 5.7%                 | 7.5%                              |
| Residues in disallowed regions           | 1.3%                 | 1.5%                              |
| Avg. <i>B</i> -factors (Å <sup>2</sup> ) |                      |                                   |
| Protein-DPPIV                            | 35.3                 | 72.5                              |
| Protein-Fab                              | 88.3                 | 134.9                             |
| Solvent                                  | 28.3                 | 53.8                              |
| ligand                                   | -                    | 77.1                              |
| r.m.s.d. in bond length (Å) <sup>c</sup> | 0.005                | 0.004                             |
| r.m.s.d. in bond angles (°) <sup>c</sup> | 1.04                 | 0.95                              |

Values in parentheses are for the highest resolution shell.

<sup>a</sup>  $R_{\text{sym}} = \sum |I_{\text{avg}} - I_j| / \sum I_j$ , where  $I_i$  is the observed intensity for the  $i$ th measurement and  $I_{\text{avg}}$  is the average intensity of all measurements.

<sup>b</sup>  $R_{\text{factor}} = \sum |F_o - F_c| / \sum F_o$ , where  $F_o$  and  $F_c$  are observed and calculated structure factors, respectively,  $R_{\text{free}}$  was calculated from a randomly chosen 5% of reflections excluded from the refinement, and  $R_{\text{factor}}$  was calculated from the remaining 95% of reflections.

<sup>c</sup> r.m.s.d. is the root-mean-square deviation from ideal geometry.

## **SUPPLEMENTAL FIGURE LEGENDS**

**Figure S1.** Binding specificity of Ab1. A) Octet binding analysis of Ab1 to rat and human DPP-IV in HBS. B) Octet binding analysis of Ab1 to targets mixed with 293 cell lysate in HBS. Key recognition epitope for Ab1's specificity is high-lighted with a text box in the sequence-alignment panel of dipeptidyl peptidases.

**Figure S2.** Inhibition of rat DPP-IV activity against its natural substrates (GLP-1 and GIP) by Ab1. A) GLP-1 as substrate. B) GIP as substrate. C) GP-pNA as substrate.

**Figure S1.**

**A.**

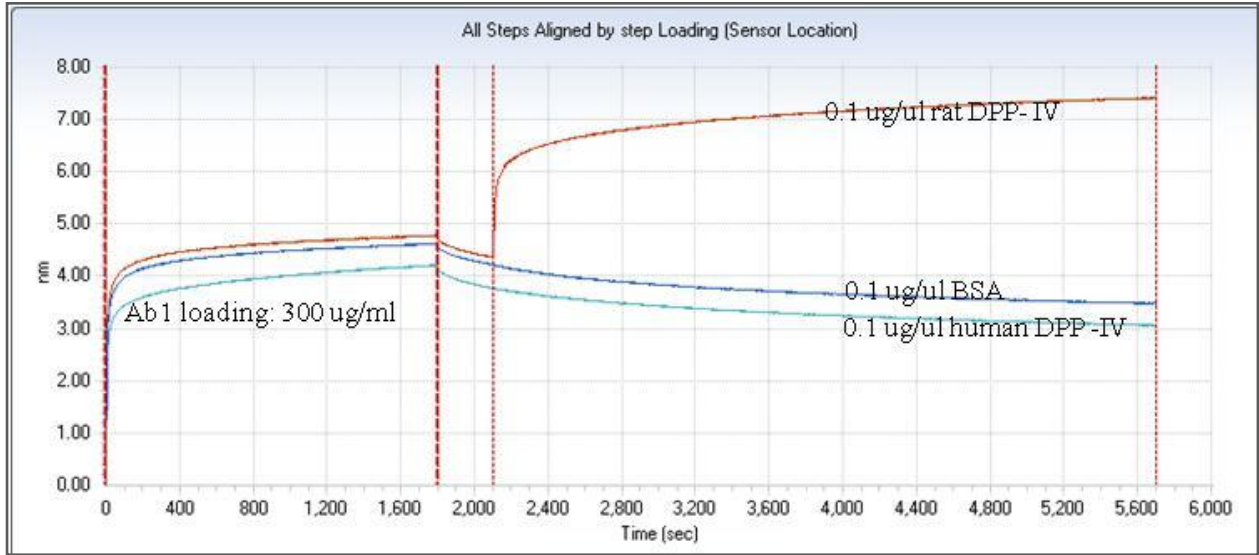

**B.**

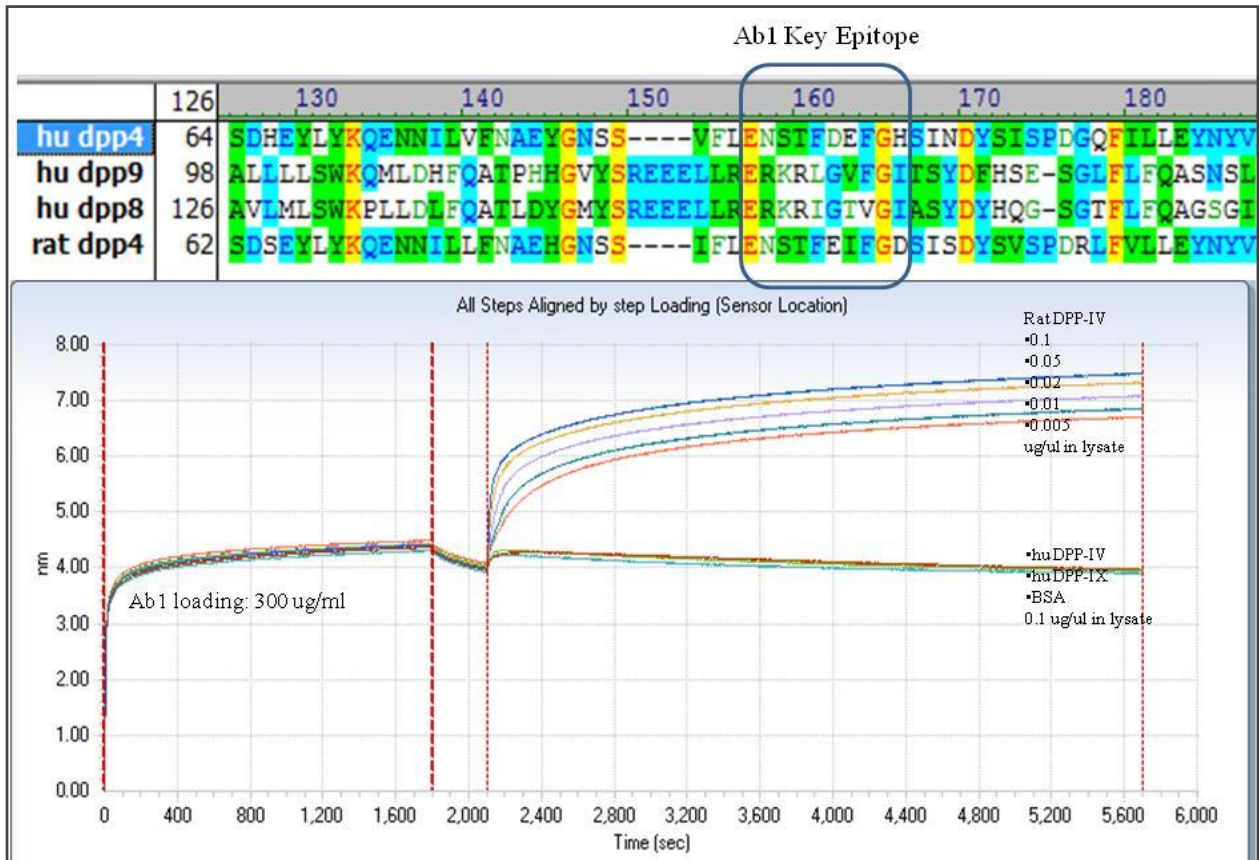

Figure S2.

A.

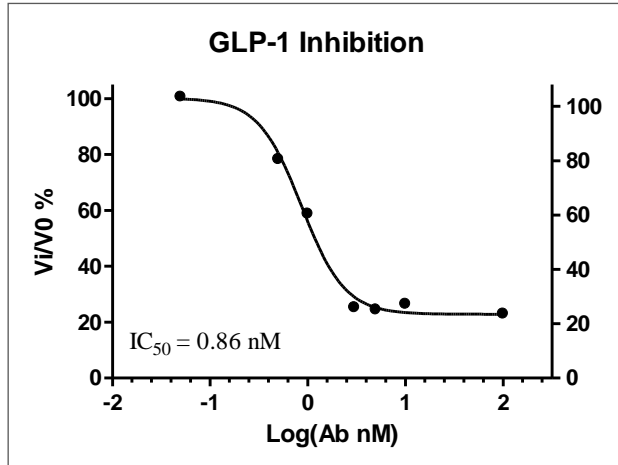

B.

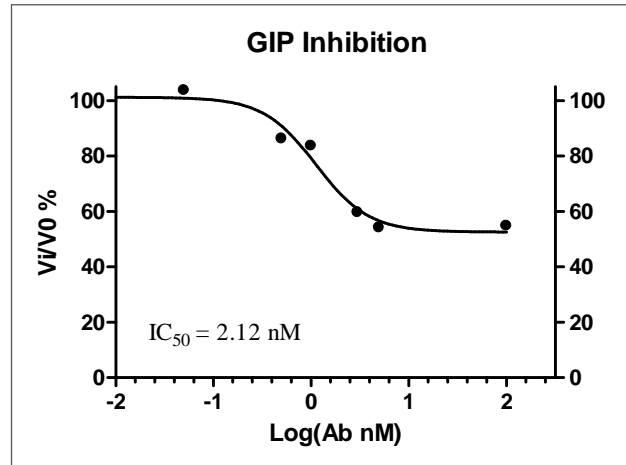

C.

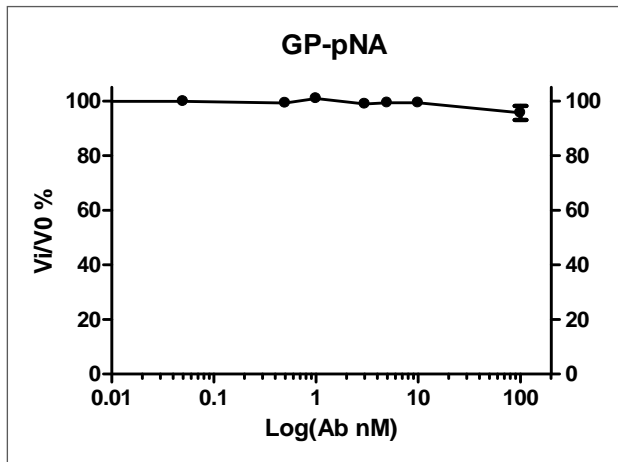

Supplement: supp_M112.396317_jbc.M112.396317-1.pdf [file supp_M112.396317_jbc.M112.396317-1.pdf]
